# Supplementary material
Source: PubMed Central journal article supplement (PMC8387966)

## **Supporting materials**

Supporting Fig. 1. PI-PLC activity assay. Purified rSMSr (0, 150, 300 ng) was used for the enzyme assay. TopFluor-PI was used as a substrate. -, no protein was added. The development solvent was Chloroform:Methanol: 15:1 (v/v). The results were the representative of two independent experiments.

**Measurement of Ceramide subspecies in tKO liver with AdV-SMSs treatment****Ceramide subspecies**

| nmol/mg protein | N16:0      | N22:0     | N23:0      | N24:2      | N24:1      | N24:0      |
|-----------------|------------|-----------|------------|------------|------------|------------|
| AdV-Null        | 0.08±0.012 | 0.1±0.009 | 0.04±0.006 | 0.02±0.002 | 0.21±0.023 | 0.17±0.019 |
| AdV-SMSr        | 0.08±0.018 | 0.13±0.02 | 0.04±0.005 | 0.03±0.007 | 0.25±0.037 | 0.19±0.014 |

Value, mean ± SD; n ≥ 3.

Supporting Fig. 1. Chiang et al.

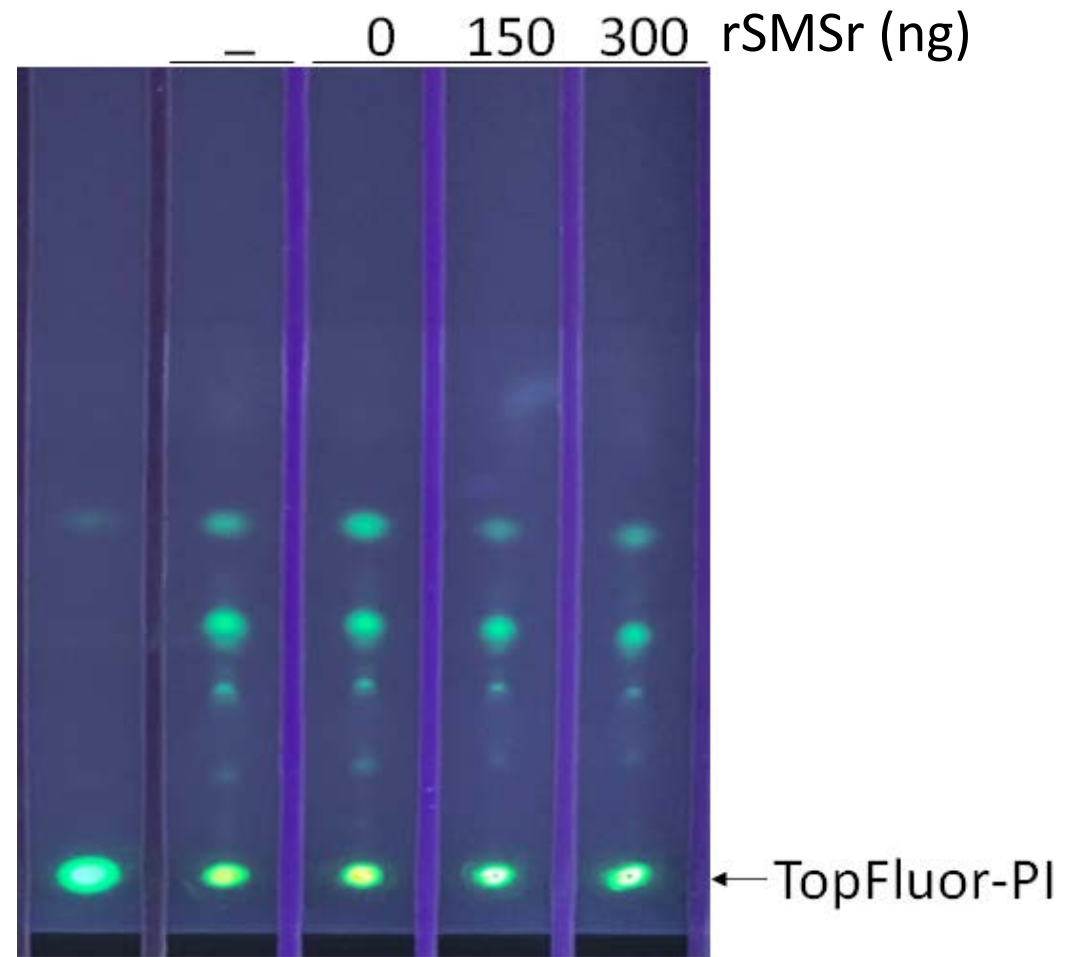

Supplement: NIHMS1731952-supplement-Supplementary_Material.pdf [file NIHMS1731952-supplement-Supplementary_Material.pdf]
